# Supplementary material for: Chickpea Ferritin CaFer1 Participates in Oxidative Stress Response, and Promotes Growth and Development
Source: PubMed Central journal article supplement (PMC4977498; doi:10.1038/srep31218), 2016-08-09
Supplement: srep31218-s1.pdf [file srep31218-s1.pdf]

# **Chickpea Ferritin CaFer1 Participates in Oxidative Stress Response, and Promotes Growth and Development**

Shaista Parveen<sup>1</sup>, Deepti Bhushan Gupta<sup>2</sup>, Suchismita Dass<sup>1</sup>, Amit Kumar<sup>1</sup>, Aarti Pandey<sup>1</sup>, Subhra Chakraborty<sup>1</sup> and Niranjan Chakraborty<sup>1</sup>

<sup>1</sup>National Institute of Plant Genome Research, Aruna Asaf Ali Marg, New Delhi-110067, India.

<sup>2</sup>Department of Biotechnology, TERI University, New Delhi.

**Running title:** CaFer1 participates in stress response

## **Address Correspondence:**

<sup>¶</sup>Dr. Niranjan Chakraborty

National Institute for Plant Genome Research

Aruna Asaf Ali Marg, New Delhi-110067, India.

E-mail: [nchakraborty@nipgr.ac.in](mailto:nchakraborty@nipgr.ac.in)

Tel: 00-91-11-26735178

Fax: 00-91-11-26741658

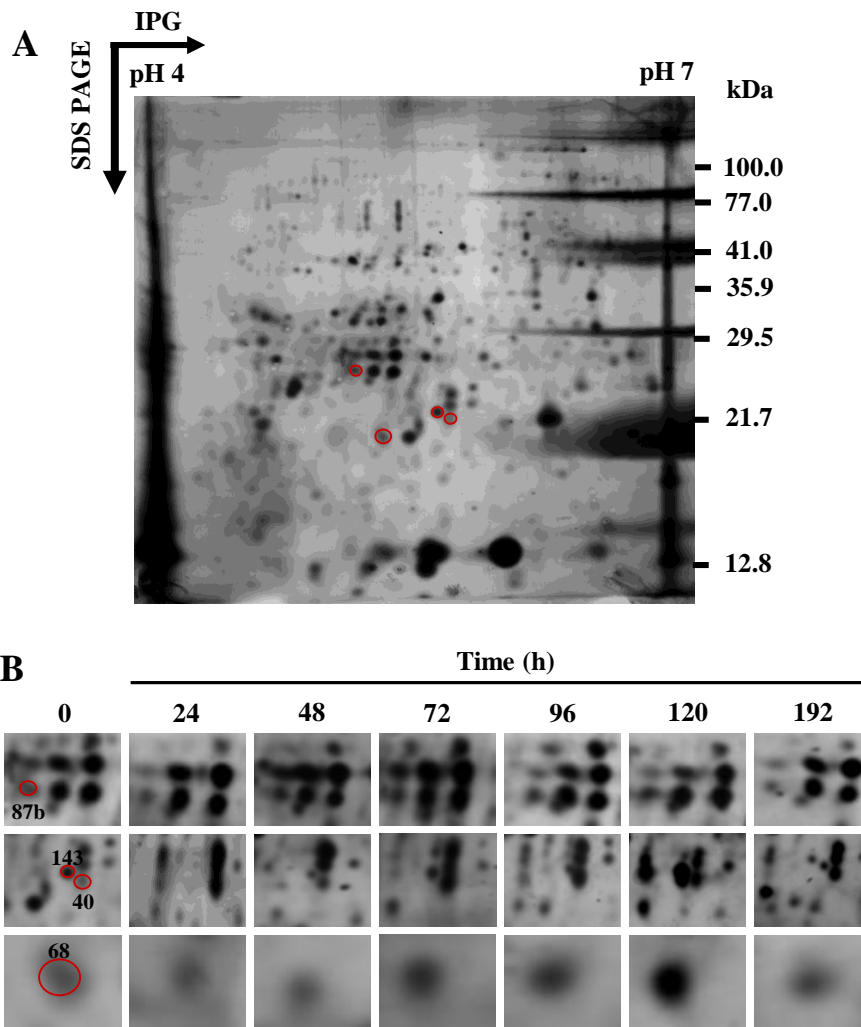

**Supplementary Fig. 1. Screening of dehydration-responsive ECM proteome and identification of phytoferritins.** (A) 2-DE profile of dehydration-responsive ECM proteome of chickpea. Differentially regulated spots of ferritins are encircled. (B) Zoomed-in gel sections correspond to the encircled regions in (A) showing temporal changes of ferritin proteins.

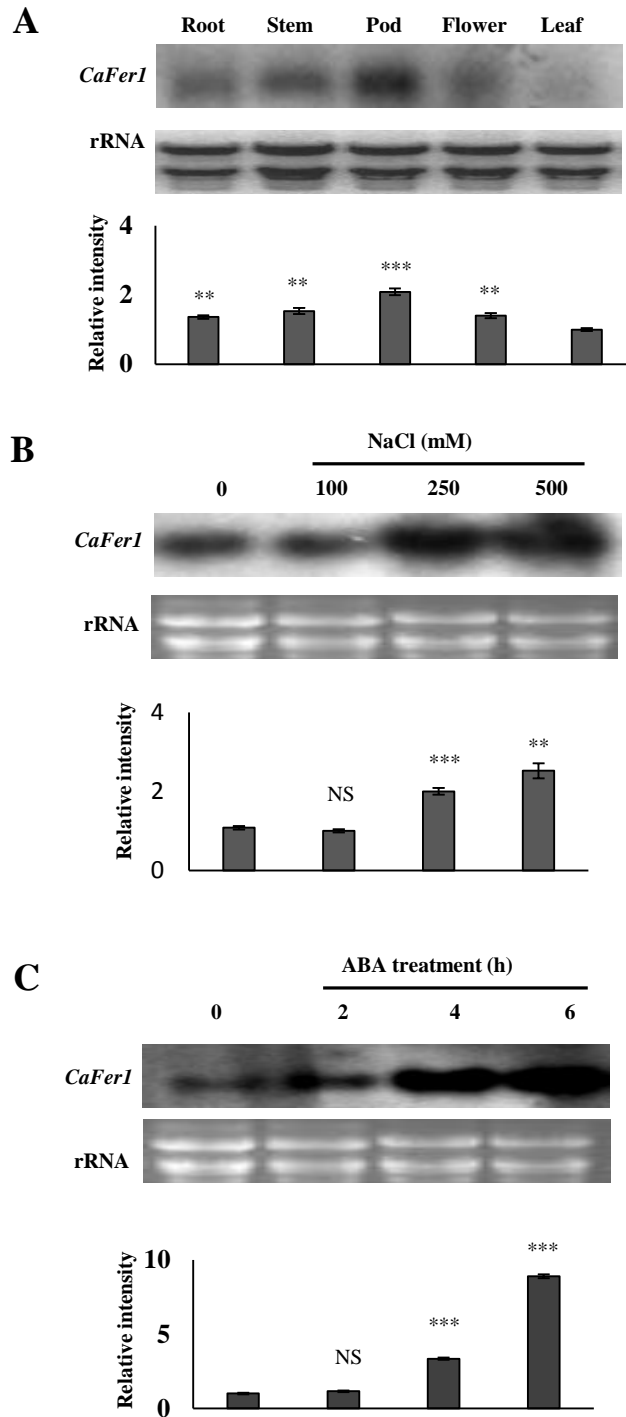

**Supplementary Fig. 2. Expression analysis of *CaFer1* in different tissues, in response to hypersalinity and ABA treatment.** (A) Northern blot showing expression of *CaFer1* in different tissues of 3-week-old chickpea plants. (B) Dose-dependent expression of *CaFer1* in response to salt. (C) Regulated expression of *CaFer1* in response to ABA treatment. The analyses were carried out with 15  $\mu$ g total RNA in each lane. Blots were hybridized with  $^{32}$ P-labeled 0.8 kb *CaFer1*. Ethidium bromide-stained rRNA served as loading control. Experiments were carried out in triplicates and the representative images are shown. Error bars represent the SE from three replicates. Asterisks indicate significant differences relative to the leaf and 0 h background (Student's t test). NS, not significant.

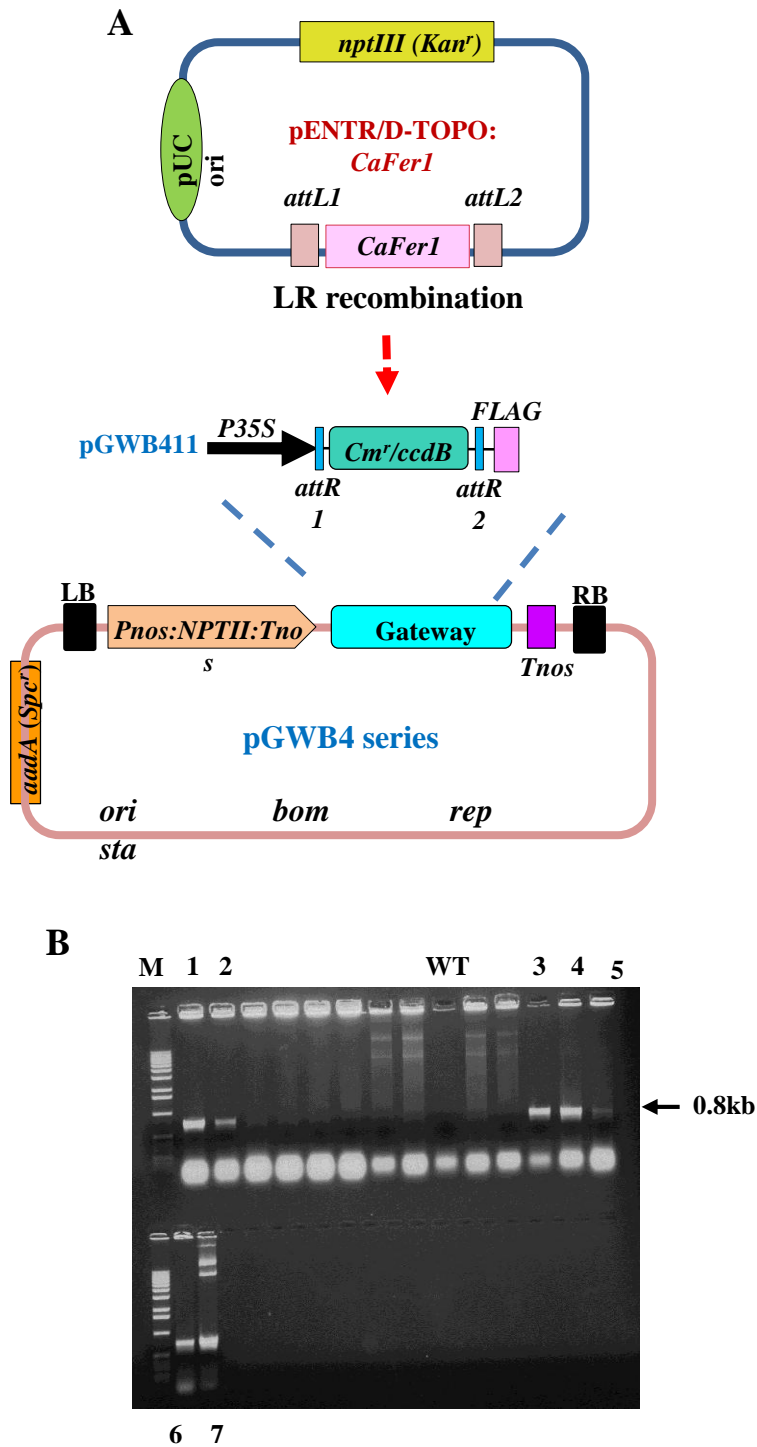

**Supplementary Fig. 3. Cloning of *CaFer1* in plant-specific vector.** (A) ORF of *CaFer1* was cloned in plant-specific gateway destination vector tagged with FLAG. (B) *CaFer1* insertion was checked by PCR in *CaFer1*-overexpressing *Arabidopsis* seedlings grown on kanamycin plates. M, marker; WT, wild-type; 1, 2, 3, 4, 5, 6 and 7 are the *CaFer1*-overexpressing lines.

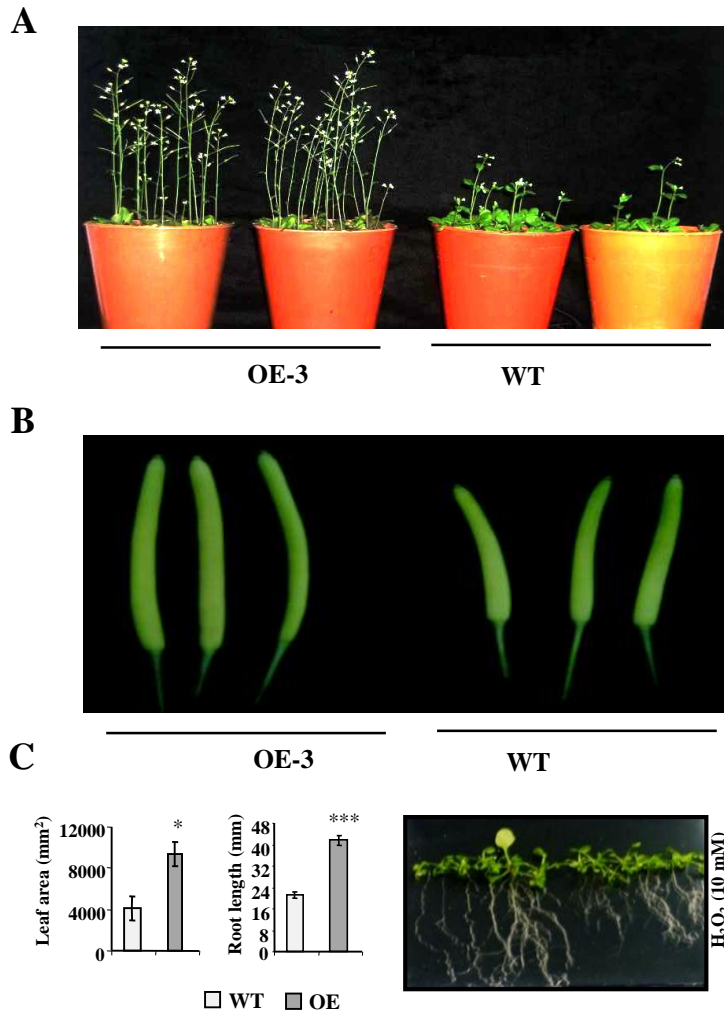

**Supplementary Fig. 4. Physiological screening of OE-3 plants.** (A) Growth phenotype of OE-3 line. (B) Increased pods in OE-3 plants. (C) WT and OE seedlings were grown on MS media supplemented with 10 mM H<sub>2</sub>O<sub>2</sub>. Histograms represent the leaf area and root length of the seedlings on the respective plate. Plate assay was done in, at least, four replicates and results of one representative experiment are shown. Error bars represent the SE from three replicates. Asterisks indicate significant differences relative to the WT background (Student's t test). WT, wild-type; OE, CaFer1-overexpressing.

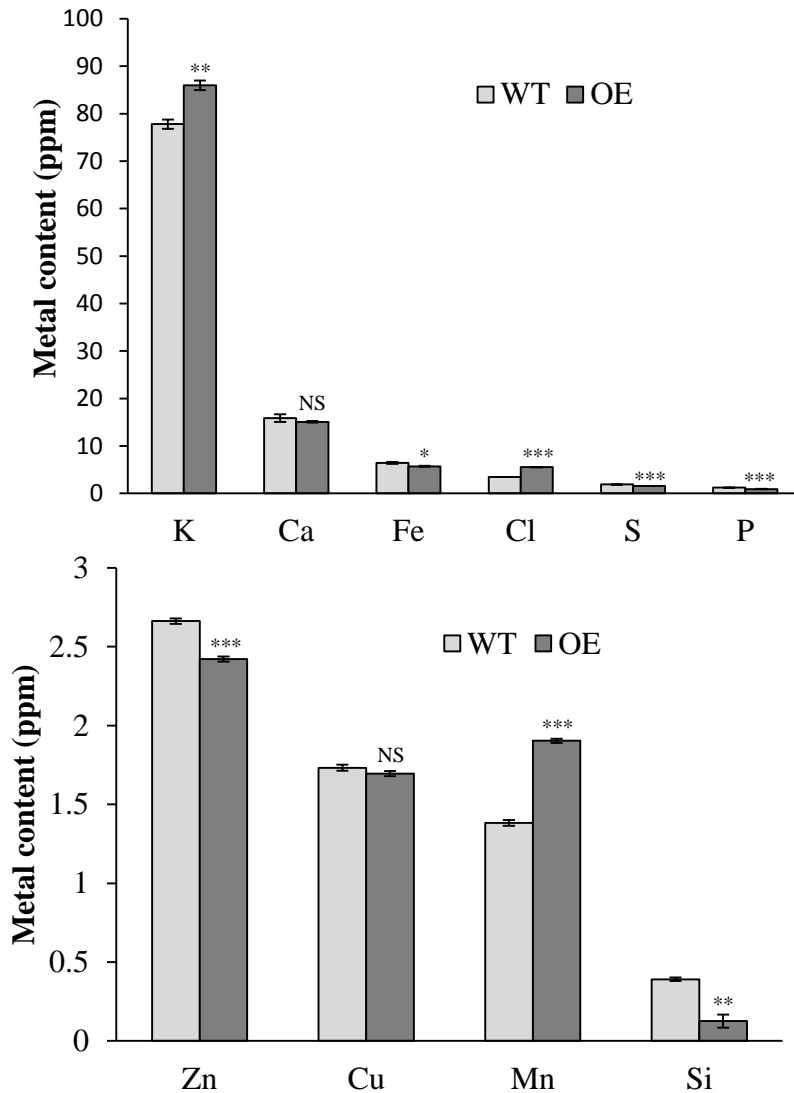

**Supplementary Fig. 5. Comparison of metal content in WT and OE plants.**

Equal amount of tissue samples from WT and OE plants were dried at 105°C in an oven and grinded to fine powder. Metal contents were determined by EDXRF analysis. Error bars represent the SE from three biological replicates. Asterisks indicate significant differences relative to the WT background (Student's t test). NS, not significant; WT, wild-type; OE, CaFer1-overexpressing.

**A**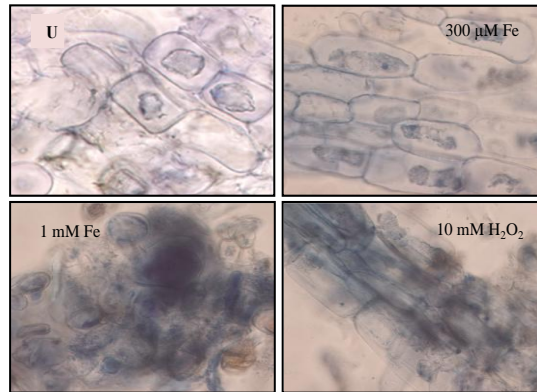**B**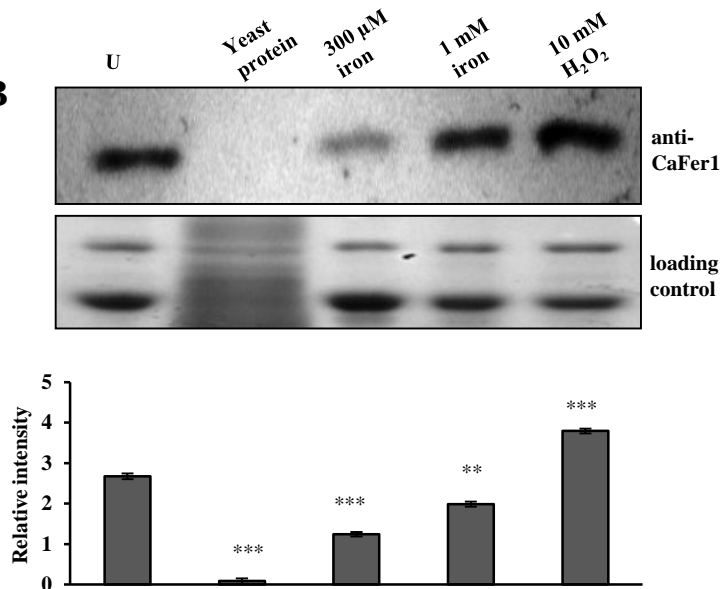

**Supplementary Fig. 6. Expression of chickpea secreted ferritin influenced by iron (Fe) and H<sub>2</sub>O<sub>2</sub>.** (A) Observation of cell death in untreated suspension culture, suspension culture treated with 300 μM Fe, 1 mM Fe and 10 mM H<sub>2</sub>O<sub>2</sub>. The cells were visualized under bright-field microscope. (B) The expression analysis of ferritin/s in the secretome in response to 300 μM and 1 mM Fe, and 10 mM H<sub>2</sub>O<sub>2</sub>. Yeast proteins served as the negative control. Coomassie-stained gel represents loading control. The fold-expression values are represented by bar graphs. Error bars represent the SE of three biological replicates. Asterisks indicate significant differences relative to the U background (Student's t test). U, untreated.

**Supplementary Table 1:** Sequences of oligonucleotide used in this study.

|                                                                            |         |     | Name                | Sequences ( 5'→3' FP;<br>3'→5' RP) |
|----------------------------------------------------------------------------|---------|-----|---------------------|------------------------------------|
| qRT-PCR<br><i>Arabidopsis</i>                                              | primers | for | AtFer1RTFP          | ACTCCCTCACGGCTCTGCTT               |
|                                                                            |         |     | AtFer1RTRP          | CCGCCGCCAACTTTCC                   |
|                                                                            |         |     | AtFer2RTFP          | TGAGGAGGTGAAGAAAGAAATGG            |
|                                                                            |         |     | AtFer2RTRP          | TGGCGAGCGAGAGAAACAA                |
|                                                                            |         |     | AtFer3RTFP          | TCCATTTTCGTCTCCGGTTTCT             |
|                                                                            |         |     | AtFer3RTRP          | GGAAGCACGAAGAGGGAAAAGA             |
|                                                                            |         |     | AtFer4RTFP          | AGCTCTCTCGCTGGTGAATTC              |
|                                                                            |         |     | AtFer4RTRP          | AATGGAAGGTAACAAAGGAGACACA          |
|                                                                            |         |     | Atfh1RTFP           | TCTACGGAAATTGCCGAGGTT              |
|                                                                            |         |     | Atfh1RTRP           | CGCCATTGCTACGGAGAAG                |
|                                                                            |         |     | FRO2RTFP            | CGATCGTTTCCTTCGGTTTC               |
|                                                                            |         |     | FRO2RTRP            | AATCCGAGCAGCGAGCAA                 |
|                                                                            |         |     | IRT1RTFP            | GCAATCTCTCCAGCAACTTCAA             |
|                                                                            |         |     | IRT1RTRP            | GTTTCGCTGACTCGCTTCCA               |
|                                                                            |         |     | IRT2RTFP            | GCGTTGATTACGATTGGACTGTT            |
|                                                                            |         |     | IRT2RTRP            | GAGGGCCATGTAGATGAGCATT             |
|                                                                            |         |     | NRAMP1RTFP          | TGCGGCTTTGGTGATTCA                 |
|                                                                            |         |     | NRAMP1RTRP          | AGCCAAATGTTTTCTGTGACAA             |
|                                                                            |         |     | NRAMP 4RTFP         | GGTGTGGCGACGGGTAGA                 |
|                                                                            |         |     | NRAMP 4RTRP         | TGCCCAAGTCGGATACTCTTCT             |
|                                                                            |         |     | UBQFP               | CGACGCTTCATCTCGTCCTCC              |
|                                                                            |         |     | UBQRP               | GGATCGATCTACCGCTACAACAG            |
|                                                                            |         |     | Actin4 FP           | GTATGTTGCCATTCAAGCTGTTC            |
|                                                                            |         |     | Actin4 RP           | GCGTAACCCTCGTAGATTGGTA             |
| qRT-PCR<br>chickpea                                                        | primers | for | CaFer1 RTFP         | GCCGCTGTAACCGCTTCTT                |
|                                                                            |         |     | CaFer1 RTRP         | CCAAACGCGAGTTTTTCAGAATT            |
|                                                                            |         |     | CaRTEF1 $\alpha$ FP | TCCACCACTTGGTCGTTTTG               |
|                                                                            |         |     | CaRTEF1 $\alpha$ RP | CTTAATGACACCGACAGCAACAG            |
| Primers of <i>CaFer1</i> for<br>cloning in yeast vector                    |         |     | CaFer1FP            | CACCATGCTTCTCAGAGCCGCTGTAACCGC     |
|                                                                            |         |     | CaFer1RP            | TCAAGCTGCAGCTGCTTCCTCGTTGAGC       |
| Primers of <i>CaFer1</i> for<br>cloning in plant<br>overexpression vectors |         |     | CaFer1FP            | CACCATGCTTCTCAGAGCCGCTGTAACCGC     |
|                                                                            |         |     | CaFer1RP            | AGCTGCAGCTGCTTCCTCGTTGAGCAAC       |

FP- Forward primer

RP-Reverse primer

RT-Real time
